# Usiigaci: Instance-aware cell tracking in stain-free phase contrast microscopy enabled by machine learning

Hsieh-Fu Tsai<sup>a,b,\*</sup>, Joanna Gajda<sup>c,1</sup>, Tyler F.W. Sloan<sup>d,1</sup>, Andrei Rares<sup>e,1</sup>,  
Amy Q. Shen<sup>a,\*</sup>

<sup>a</sup>*Micro/Bio/Nanofluidics Unit, Okinawa Institute of Science and Technology Graduate University, 1919-1 Tancha, Onna, Okinawa Japan 904-0495*

<sup>b</sup>*Research Fellow of Japan Society for the Promotion of Science*

<sup>c</sup>*AGH University of Science and Technology, Poland*

<sup>d</sup>*Quorumetrix Solutions, Canada*

<sup>e</sup>*ImagineA, The Netherlands*

---

## Abstract

Stain-free, single-cell segmentation and tracking is tantamount to the holy grail of microscopic cell migration analysis. Phase contrast microscopy (PCM) images with cells at high density are notoriously difficult to segment accurately; thus, manual segmentation remains the de facto standard practice. In this work, we introduce Usiigaci, an all-in-one, semi-automated pipeline to segment, track, and visualize cell movement and morphological changes in PCM. Stain-free, instance-aware segmentation is accomplished using a mask regional convolutional neural network (Mask R-CNN). A Trackpy-based cell tracker with a graphical user interface is developed for cell tracking and data verification. The performance of Usiigaci is validated with electrotaxis of NIH/3T3 fibroblasts. Usiigaci provides highly accurate cell movement and morphological information for quantitative cell migration analysis.

*Keywords:* phase contrast microscopy, instance-aware segmentation, machine learning, convolutional neural network, stain-free cell tracking, single-cell migration

---

---

\*Corresponding author

*Email addresses:* [hsieh-fu.tsai@oist.jp](mailto:hsieh-fu.tsai@oist.jp) (Hsieh-Fu Tsai),  
[joannagajda5@gmail.com](mailto:joannagajda5@gmail.com) (Joanna Gajda), [info@quorumetrix.com](mailto:info@quorumetrix.com) (Tyler F.W. Sloan), [a.rares@ieee.org](mailto:a.rares@ieee.org) (Andrei Rares), [amy.shen@oist.jp](mailto:amy.shen@oist.jp) (Amy Q. Shen)

<sup>1</sup>contributed equally

## 1 1. Motivation and significance

2 Cell migration is a fundamental cell behavior that underlies various phys-  
3 iological processes, including development, tissue maintenance, immunity,  
4 and tissue regeneration, as well as pathological processes such as metastasis.  
5 Many *in vitro* as well as *in vivo* platforms have been developed to investigate  
6 molecular mechanisms underlying cell migration in different microenviron-  
7 ments with the aid of microscopy. To analyze single- or collective-cell migra-  
8 tion, reliable segmentation of each individual cell in microscopic images is  
9 necessary in order to extract location as well as morphological information.

10 Among bright-field microscopy techniques, Zernike’s phase contrast mi-  
11 croscopy (PCM) is favored by biologists for its ability to translate phase dif-  
12 ferences from cellular components into amplitude differences, so as to make  
13 the cell membrane, the nucleus, and vacuoles more visible [1]. However,  
14 PCM images are notoriously difficult to segment correctly using conven-  
15 tional computer vision methods, due to the low contrast between cells and  
16 their background [2]. For this reason, many cell migration experiments still  
17 rely on fluorescent labeling of cells or manual tracking. Fluorescent labeling  
18 of cells requires transgenic expression of fluorescent proteins or cells tagged  
19 with fluorescent compounds, both of which can be toxic to cells and which  
20 require extensive validation of phenotypic changes. Although thresholding  
21 fluorescent images is relatively straightforward, cells that are in close prox-  
22 imity are often indistinguishable in threshold results. On the other hand,  
23 manual tracking of cell migration is labor-intensive and prone to operator  
24 error. Conducting high-throughput microscopy experiments is already possi-  
25 ble thanks to methodology and instrumental advances, but current analytical  
26 techniques to interpret results quantitatively face major obstacles due to im-  
27 perfect cell segmentation and tracking [3]. Moreover, cell movement is not  
28 the only parameter of interest in cell migration. For cell migration guided  
29 by environmental gradients, shear stress, surface topology, and electric field  
30 can also impact cell morphology [4–7].

31 Although many software packages have been developed for cell track-  
32 ing, the majority of them handle only fluorescent images and require good  
33 thresholding results [8]. While some software tackles stain-free cell tracking,  
34 outlining each individual cell accurately to the cell boundary is difficult; thus,  
35 these packages are limited to positional tracking and cannot resolve adjacent  
36 or touching cells [8–12]. Migrating cells in ameboid or mesenchymal mode  
37 often have thin protruding cellular structures for locomotion, such as blebs  
38 or lamellipodia [13]. These structures exhibit very low contrast in PCM,  
39 which prevents reliable segmentation, even though they are essential for cell  
40 migration.

41 In recent years, advances in machine learning using convolutional neu-  
42 ral networks (CNNs) have proven effective at solving computer vision prob-  
43 lems [14–16]. Among them, Deepcell architecture, proposed by Van Valen *et*  
44 *al.*, has demonstrated that cells in close proximity can be segmented using  
45 pixel-wise classification of the background, the cell membrane, and the cell  
46 cytoplasm [15]. However, fluorescent staining of cell nuclei is still needed for  
47 optimal segmentation of these PCM images.

48 To address the above challenges, we introduce newly developed stain-  
49 free, instance-aware cell tracking software for PCM, called Usiigaci. Stain-  
50 free, instance-aware segmentation of phase contrast microscopy images is  
51 appealing to biologists because cells are free of labeling damage and their  
52 analysis does not suffer from false readings. Moreover, both locations and  
53 outlines of cells can be analyzed in their entirety.

## 54 2. Software description

### 55 2.1. Software overview

56 Usiigaci, pronounced as *ushi:gachi* by Hepburn romanization, is a Ryukyuan  
57 word that refers to tracing the outlines of objects, which is an appropriate  
58 description of the function of our software. Usiigaci has a semi-automated  
59 workflow consisting of three modules: a segmentation module, a tracking  
60 module, and a data processing module, all written in standard Python syn-  
61 tax (Figure 1).

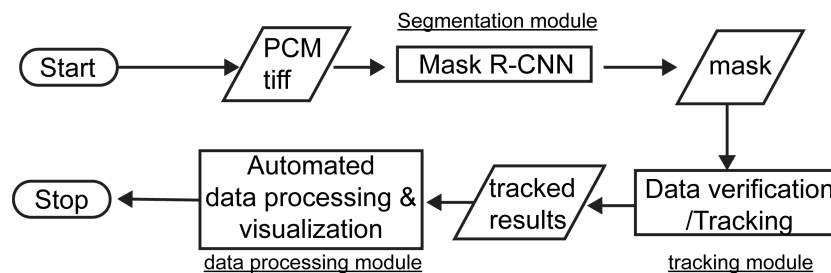

Figure 1: The all-in-one segmentation, tracking, and data processing workflow of Usiigaci.

62 A Mask R-CNN model pretrained with the Microsoft COCO dataset [17]  
63 was further trained using 50 manually annotated PCM images with single  
64 cell outlines as a classification class (more details in S1.4 and S1.5 in the SI  
65 document for preparing custom training data and to initiate new training).  
66 Using this trained model, PCM images are provided as input to the Mask  
67 R-CNN-based segmentation module and highly accurate instance-aware seg-  
68 mented masks are generated [18]. Outlines of individual cells in the images

69 are correctly segmented into identifiers (IDs), even if they are in close prox-  
70 imity. IDs are then linked and tracked in the tracking module. With the  
71 aid of a graphical user interface (GUI) in the tracking module, side-by-side  
72 comparison of PCM images and tracked masks allow users to validate seg-  
73 mentation and tracking results. At this point, unwanted cell tracks, such  
74 as imperfectly segmented or tracked cells, mitotic cells, or dead cells can be  
75 excluded by users prior to data processing. Thereafter, step-centric and cell-  
76 centric parameters of cell migration, as well as visualization of cell migration  
77 data are computed and generated automatically from the tracked results in  
78 the data processing module (Table S.1 in the SI document).

79 Based on the three modules described above, Usiigaci is an all-in-one,  
80 semi-automated solution for stain-free cell migration analysis in PCM, with  
81 a biologist-friendly workflow.

## 82 *2.2. Software architecture and functionality*

83 A diagram of segmentation and tracking modules of Usiigaci is shown  
84 in Figure 2. The segmentation module of Usiigaci is based on a Mask R-  
85 CNN model that is implemented in TensorFlow and Keras, as originally  
86 open-sourced by Matterport Inc. under the MIT license [19–21]. A detailed  
87 diagram of Mask R-CNN architecture is shown in Fig. S.3 in the SI doc-  
88 ument. The Mask R-CNN model is built upon the Faster R-CNN model  
89 that has achieved rapid identification of objects through searching regions  
90 of interest (ROIs) on feature maps [18, 22]. Raw images undergo multi-  
91 ple convolutional operations in a R-CNN backbone, which is composed of a  
92 residual function network (ResNet-101, [23]) and a feature pyramid network  
93 (FPN, [24]), to generate 5 feature maps (C1 to C5). ROIs are searched on  
94 feature maps using region proposal layers. An accurate instance-segmented  
95 ROI map is generated by an ROI align layer to correct for misalignment in  
96 the ROI Pooling operation. After upsampling, entire outlines of individual  
97 cells are segmented into polygons bearing unique IDs in the exported mask.  
98 As a result, highly accurate, instance-aware segmentation of stain-free PCM  
99 images is realized.

100 After segmentation, each mask contains segmented cell outlines bearing  
101 a unique identifier (ID). The IDs are then used for linking and tracking in  
102 the tracking module built on the Trackpy library [25]. The features of an ID,  
103 such as location, equivalent diameter, perimeter, eccentricity, orientation,  
104 and true solidity, are used as parameters in Trackpy for tracking. IDs in  
105 each consecutive mask in a time-lapse experiment belonging to the same cell  
106 are searched by the Trackpy library using its default nearest neighbor search  
107 option, namely the k-dimension tree algorithm [26–28].

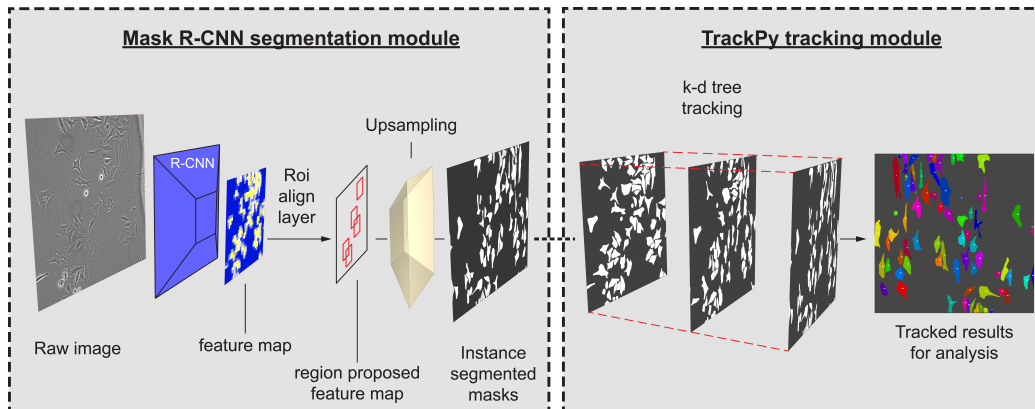

Figure 2: Diagram of segmentation and tracking modules of Usiigaci. PCM images are processed in a Mask R-CNN segmentation module with a region proposal network, which has a backbone of ResNet-101 and a feature pyramid network (FPN), to generate instance-segmented masks. Objects in the masks are linked and tracked in a Trackpy-based tracker using the k-dimensional tree algorithm. Important cell migration parameters are then computed from the tracked results.

108        Linking and tracking are followed by automatic post-processing, where  
109 segmentation and tracking results are corrected in two steps. In the first  
110 step, a cell wrongly segmented as two IDs is corrected by merging the two  
111 IDs. In the second step, IDs in consecutive frames belong to the same track,  
112 but suffering from interrupted events are re-linked. A GUI based on the  
113 PyQt and PyQtGraph library for the tracking module is developed so that  
114 users can verify segmentation and tracking results [29, 30]. Manual verifica-  
115 tion is important because imperfections in segmentation can cause errors in  
116 tracking. In addition, cells that undergo mitosis and cells that enter or exit  
117 the viewfield during the experiment generate tracking results that are not  
118 meaningful in single cell migration studies (Fig. S.6 in the SI document).  
119 In the GUI of the tracking module, by imposing a simple criterion, *select*  
120 *complete tracks*, the valid tracks IDs of which exist in every frame, can be se-  
121 lected. Thereafter, users can manually verify whether the tracking is correct  
122 by cross-referencing against raw images. The amount of labor in the proposed  
123 workflow is less than that associated with conventional manual tracking [4].  
124 Subsequently, centroid and morphology parameters such as angle, perimeter,  
125 and area of each ID in valid tracks can be extracted and produced using the  
126 scikit-image library [31].

127        Analysis of single-cell migration data is accomplished in the data pro-  
128 cessing module to compute migration parameters for each ID throughout the  
129 time-lapse experiment (Fig. S.1.B). Several data processing libraries, includ-  
130 ing the Python data analysis library (Pandas), NumPy, and SciPy, are used

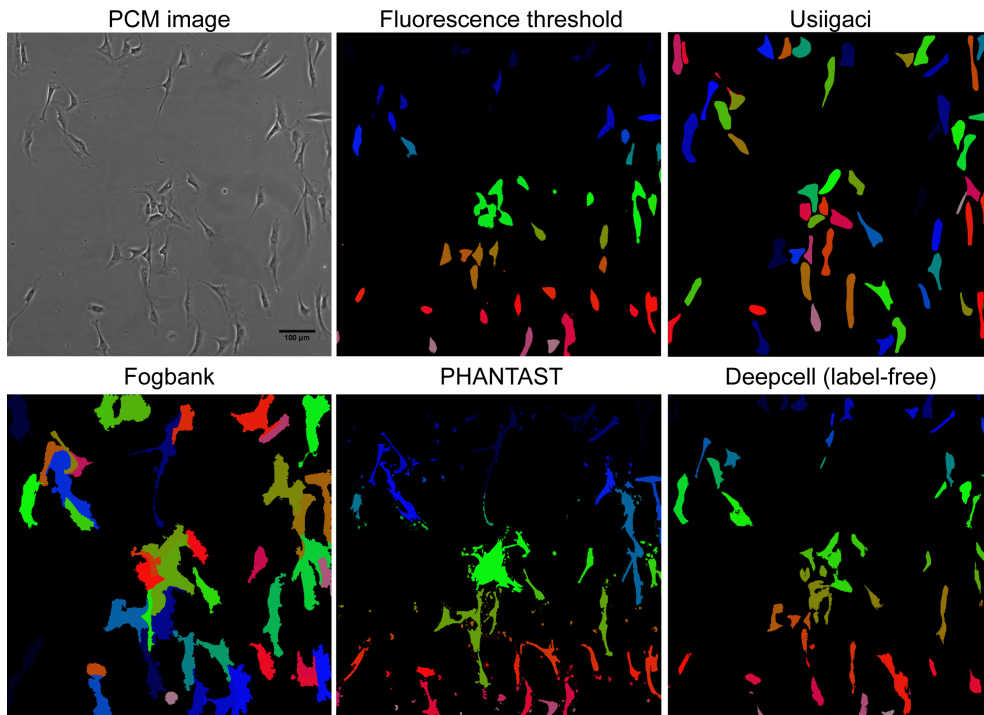

Figure 3: Microscopy of NIH/3T3 cells stained with CellTracker Green under PCM and fluorescence microscopy, compared with segmentation results of Usiigaci, Fogbank, PHANTAST, and Deepcell on the PCM image. Different color represents instances of each region of interest. In Usiigaci, Fogbank, and Deepcell, each cell is segmented into an instance outline with a unique ID and color. In segmented masks of fluorescence-thresholded or PHANTAST, cells are segmented into ROIs using the *analyze particle* function in ImageJ and filled with pseudocolors using the ROImap function in the LOCI plug-in. Usiigaci accurately segmented each individual cell with accuracy superior to that of other software.

131 for processing cell migration data [32–34]. Step-centric and cell-centric fea-  
132 tures, such as turning angle, net trigonometric distance, speed, orientation,  
133 and directedness are computed automatically in a Jupyter Notebook (Table  
134 S.1) [35, 36]. Moreover, automated visualization of cell migration in cell tra-  
135 jectory plots, box plots, and time-series plots is generated with the aid of  
136 Matplotlib and Seaborn plotting libraries (Fig. S.9) [37, 38].

### 137 3. Validation of Usiigaci

#### 138 3.1. Segmentation module

139 Stain-free tracking of NIH/3T3 fibroblasts electrotaxis in a 300 V/m di-  
140 rect current electric field (dcEF) for 10 hr under PCM is used to demon-  
141 strate unique features of Usiigaci. Details of cell experiments and imaging



142 are described in the supplementary information. Segmentation and tracking  
143 performance of Usiigaci is benchmarked against state-of-the-art free software  
144 such as PHANTAST [11], Fogbank [12], Deepcell [15] as well as proprietary  
145 software such as Imaris and Metamorph. Segmentation results of Usiigaci and  
146 aforementioned software are shown in Figure 3 and quantitatively analyzed  
147 by segmentation evaluation metrics (Table S.2 in the SI document). Segmen-  
148 tation similarity can be evaluated using the mean ratio of intersection over  
149 union (mIoU), which is also known as the Jaccard index (Figure 4).

150 By fluorescence thresholding, thicker cell bodies can be segmented easily,  
151 but thinner structures, such as lamellipodia or blebs, often fail to be seg-  
152 mented and contribute to higher specificity and lower mIoU (Table 1 & Fig.  
153 S.7 in the SI document). In Fogbank and PHANTAST, images are thresh-  
154 olded by local contrast, thus segmentation is effective only if single cells are  
155 well isolated. The segmentation similarity achieved by Fogbank and PHAN-  
156 TAST is moderately high (mIoU 0.46 and 0.63), but single-cell tracking in  
157 images with high cell density is not effective using these two methods, be-  
158 cause individual cells cannot be distinguished. By classifying cell membranes  
159 through machine learning methods, Deepcell segments high density cells bet-  
160 ter than conventional methods. However, due to the pixel-level classification  
161 methods in Deepcell, adjacent cells without clear boundaries are sometimes  
162 difficult to segment. In Usiigaci, entire outlines of cells are segmented cor-  
163 rectly in an instance-aware fashion, even if cells are densely packed. The  
164 segmentation similarity of Usiigaci with a single trained model is 2.2 times  
165 higher than that of the fluorescence threshold method. Usiigaci’s segmenta-  
166 tion also outperforms other benchmarked segmentation software (Table 1 &  
167 Figure 4). Moreover, the segmentation speed of Usiigaci is fast in comparison  
168 to manual segmentation and benchmarked software (see Fig. S.8 in the SI  
169 document).

170 However, the potential limitation of Usiigaci’s Mask R-CNN (essentially a  
171 machine learning method), is that segmentation accuracy may be profoundly  
172 impacted if the segmentation image is significantly different from that in the  
173 training dataset (see detailed discussion in section S2.3 in the SI document).  
174 A proper training dataset created by end users with a user-specific exper-  
175 imental configuration may be necessary for optimal results. The detailed  
176 description of training data preparation and training process in supplement-  
177 ary section S1.4 and S1.5 should help users to achieve optimal results if a  
178 new training dataset is required.

### 179 *3.2. Tracking module*

180 Mask R-CNN segments cells in an instance-aware manner such that each  
181 segmented cell possesses a unique ID (shown with pseudo-color in Figure 3).

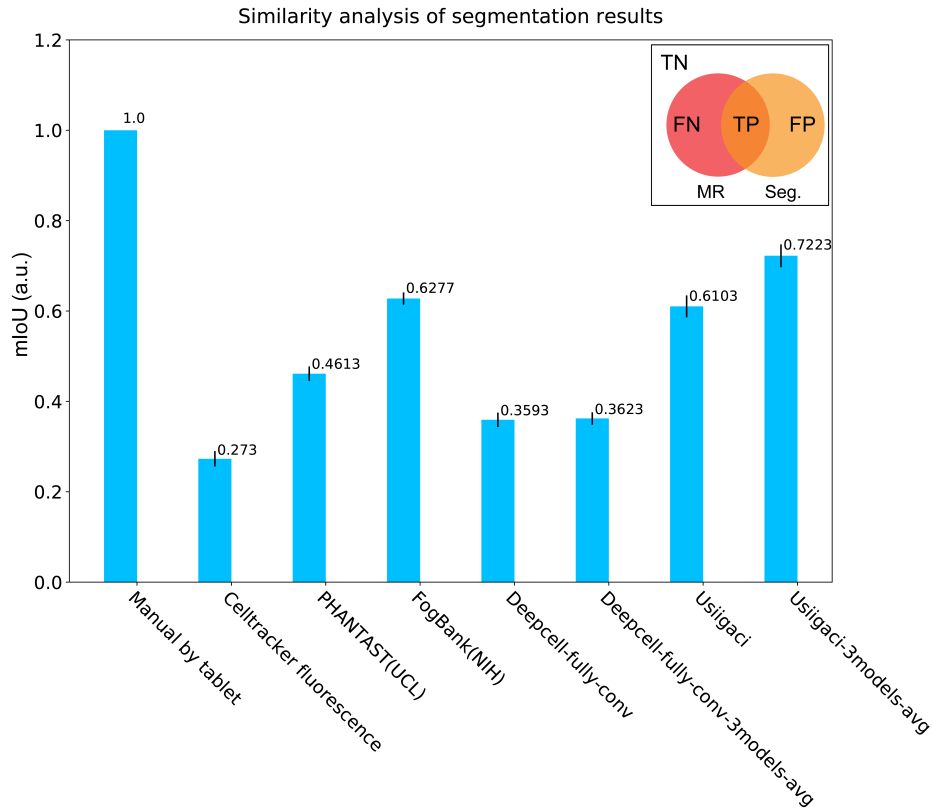

Figure 4: Segmentation similarity averaged among three NIH/3T3 cell images using various methods. MR: Manual reference; Seg.: Segmented results; FN: False negative; TP: True positive; FP: False positive; TN: True negative. Segmentation similarity is measured by the mean intersection over union between ground truth and segmented results ( $mIoU = \frac{\sum_i TP_i}{\sum_i (FN_i + TP_i + FP_i)}$ , as shown in the inset), or also known as the Jaccard index.

Table 1: Segmentation performance averaged among three NIH/3T3 cell images using various methods. Ch: channel

|                       | Ch  | Jaccard index | F1 score  | Precision | Recall    | Specificity | Accuracy  |
|-----------------------|-----|---------------|-----------|-----------|-----------|-------------|-----------|
| Manual                | PCM | 1             | 1         | 1         | 1         | 1           | 1         |
| Automatic threshold   | FL  | 0.27±0.03     | 0.46±0.02 | 0.97±0.02 | 0.30±0.01 | 1±0         | 0.91±0.01 |
| PHANTAST              | PCM | 0.46±0.02     | 0.59±0.09 | 0.70±0.19 | 0.51±0.02 | 0.97±0.03   | 0.91±0.03 |
| Fogbank               | PCM | 0.63±0.02     | 0.77±0.02 | 0.65±0.02 | 0.93±0.02 | 0.94±0.01   | 0.94±0.01 |
| Deepcell 3models-avg  | PCM | 0.36±0.04     | 0.56±0.06 | 0.39±0.06 | 0.96±0.01 | 0.92±0.01   | 0.92±0.01 |
| Usiiigaci 3models-avg | PCM | 0.72±0.01     | 0.85±0.01 | 0.83±0.02 | 0.87±0.01 | 0.95±0.04   | 0.96±0.01 |

182 The IDs in consecutive images are linked and tracked in the tracking module.  
 183 A GUI is developed to provide manual data verification for users to identify  
 184 potential errors in segmentation and tracking (Figure 5). A simple criterion,



185 *select complete tracks*, is built in the GUI for selecting tracks with IDs that  
186 exist in every frame. Imposing the criterion ensures high probability of valid  
187 tracks (Fig. S.6). Furthermore, the validity of cell tracks can be verified by  
188 users. Tracks that are biologically invalid, such as those having cells that  
189 have undergone mitosis or cell death, can be excluded manually. Usiigaci  
190 provides a labor-saving workflow while preserving the capacity for human  
191 intervention, which is essential to ensure data validity in single-cell migration  
192 analysis [39].

193 We characterized tracking performance using multiple object tracking  
194 (MOT) metrics and tracking quality measures on a triplicate 10-hr NIH/3T3  
195 electrotaxis dataset (Table S.3). MOT metrics measure the performance of  
196 trackers based on how accurately the objects in every frame are tracked.  
197 Tracking quality can be understood more intuitively by classifying individ-  
198 ual cell tracks in tracking quality measures. Detailed definition of tracking  
199 performance is discussed in the supplementary section S1.7.

200 The MOT performance of Usiigaci with or without manual verification  
201 is benchmarked against manual tracking as shown in Table 2 [40, 41]. In  
202 manual tracking, the multiple object tracking precision (MOTP) and multi-  
203 ple object tracking accuracy (MOTA) are arbitrarily defined as 1. A total  
204 of 4520 events are identified, summed from all frames. After tracking by the  
205 Usiigaci tracker, 4470 events are identified with MOTA of 91.9%. By impos-  
206 ing the *select complete track* criterion, events belonging to invalid tracks (Fig.  
207 S.6 B-H) are easily removed. The MOTPs describing the total error in posi-  
208 tions of matched object-hypothesis pairs in Usiigaci before and after manual  
209 verification are 70.2% and 75.6%, which are similar to the Jaccard index in  
210 segmentation [40]. The masks of tracked cells correlate well with those by  
211 manual segmentation at pixel level, which suggests that cell movements and  
212 morphology changes can be tracked and analyzed quantitatively.

213 Tracking quality using the Usiigaci tracker can be understood more in-  
214 tuitively by classifying individual cell tracks. By manual tracking, 104 valid  
215 tracks are found among 155 total tracks. Using the Usiigaci tracker, 291  
216 tracks are generated and many of which are erroneous due to different types  
217 of error (Fig S.6). The valid track ratio in Usiigaci is only 19.5% without  
218 manual verification. However, by the *select complete tracks* criterion, users  
219 can select only the tracks with the same ID in every frame. Valid cell tracks  
220 will be among those selected with the criterion. Users can also verify whether  
221 there are any erroneous tracks and exclude them if necessary. Five mitosis  
222 tracks exist in the remaining results and they are excluded manually. The  
223 valid tracks obtained from Usiigaci after manual verification correspond to  
224 54% of valid tracks identified by a human operator. However, more viewfields  
225 can be analyzed to increase the number of valid tracks with the labor-saving

226 workflow of Usiigaci.

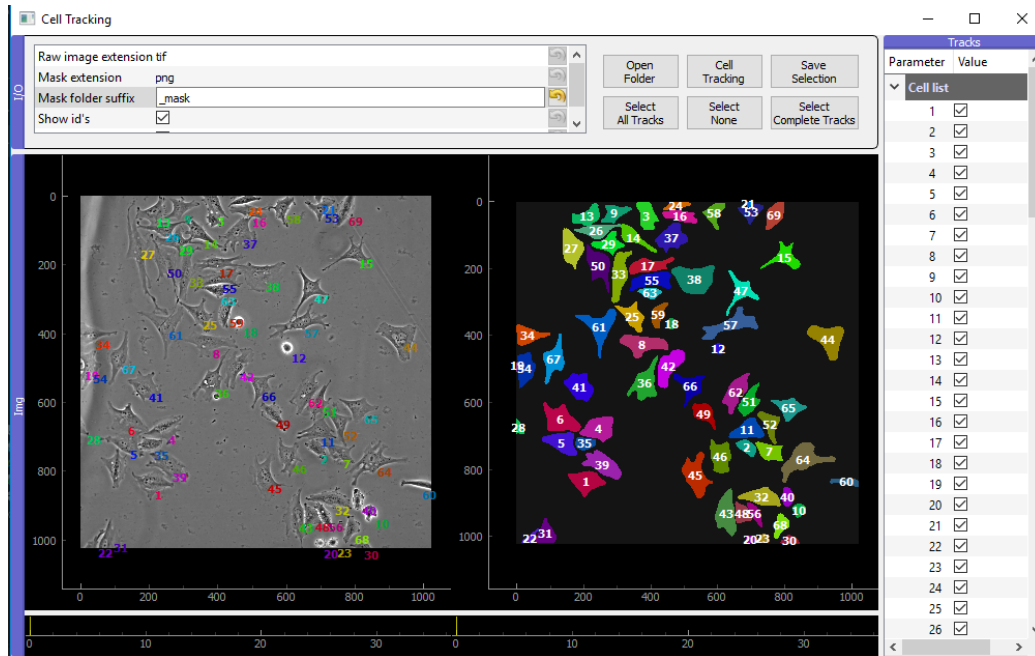

Figure 5: The GUI of the tracking module in Usiigaci. PCM images of a time-lapse experiment are shown in the left panel to compare with the Mask R-CNN segmented masks in the right panel. After tracking, cell tracks are listed on the right and users can verify data against PCM images and exclude bad cell tracks.

### 227 3.3. Data processing module

228 Quantitative cellular dynamics require both accurate cell segmentation  
229 and cell tracking. After tracking, the data processing module of Usiigaci  
230 generates quantitative results of step-centric and cell-centric parameters in  
231 cell migration based on the tracking results. Visualization of cell migration  
232 is carried out automatically to generate visual representations that can be  
233 understood intuitively (Fig. S.9 in the SI document).

234 We further examine overall accuracy in the context of cell migration  
235 among the results segmented and tracked using various methods. Direct-  
236 edness is a metric to show directional cell migration. Directness is defined as  
237 the average cosine between the net trigonometric distance and electric cur-  
238 rent vector (Fig. S.1B). A group of cells migrating toward the cathode has  
239 a directedness of 1, and random migrating cells possess a directedness of 0  
240 (Table S.1). The directedness of NIH/3T3 cells in dcEF is used to benchmark  
241 the accuracy of results tracked by various tracking methods including manual  
242 tracking in ImageJ, the track object module in Metamorph, Imaris Track,

Table 2: Summary of multiple object tracking of NIH/3T3 electrotaxis after 10-hr under 300 V/m dcEF (31 frames). Metrics are compared among manual tracking and Usiigaci with and without the *select complete tracks* criterion and manual verification. MOTP: Multiple object tracking precision; MOTA: Multiple object tracking accuracy.

| MOT metrics                     | Manual            | Usiigaci<br>(unverified) | Usiigaci<br>(select complete track) |
|---------------------------------|-------------------|--------------------------|-------------------------------------|
| Total events                    | 4520 <sup>a</sup> | 4470                     | 1736                                |
| Miss events                     | 0                 | 145                      | 0                                   |
| Mismatch events                 | 0                 | 70                       | 0                                   |
| False positive events           | 0                 | 165                      | 0                                   |
| MOTA                            | 1                 | 0.919±0.01               | n/a                                 |
| MOTP (mIoU)                     | 1                 | 0.702±0.012 <sup>b</sup> | 0.756±0.009 <sup>b</sup>            |
| <b>Tracking quality measure</b> |                   |                          |                                     |
| Total tracks                    | 155 <sup>c</sup>  | 291 <sup>d</sup>         | 61                                  |
| Valid single tracks             | 104               | 56                       | 56                                  |
| Interrupted single cell tracks  | 0                 | 21                       | 0                                   |
| Mitosis cell tracks             | 5                 | 5                        | 5                                   |
| Entering viewfield tracks       | 19                | 19                       | 0                                   |
| Loss of tracking tracks         | 0                 | 152                      | 0                                   |
| Exiting viewfield tracks        | 27                | 27                       | 0                                   |
| Mismatch tracks                 | 0                 | 2                        | 0                                   |
| False positive tracks           | 0                 | 9                        | 0                                   |
| Valid track ratio               | 0.67 <sup>e</sup> | 0.19 <sup>f</sup>        | 0.92 <sup>g</sup>                   |

<sup>a</sup> Total objects identified by a human operator.

<sup>b</sup> Mean intersection over union ratio of all matched-object pairs in mean±standard error of mean.

<sup>c</sup> Total cell tracks identified by a human operator.

<sup>d</sup> Total cell tracks generated by Usiigaci's tracker.

<sup>e</sup> Ratio of valid cell tracks to total cell tracks in the dataset identified by a human operator.

<sup>f</sup> Ratio of valid cell tracks to total cell tracks generated by Usiigaci's tracker.

<sup>g</sup> Ratio of valid cell tracks to total cell tracks after the *select all tracks* criterion.

243 and tracking with Lineage Mapper (Figure 6 & Fig. S.10). PCM images,  
 244 fluorescence images, or segmented masks from either Usiigaci, PHANTAST,  
 245 Fogbank, or Deepcell are used in each tracking software accordingly. Only  
 246 valid cell tracks that contains cells being tracked in every frame are ana-  
 247 lyzed. Capture rate is defined as the ratio between valid cell tracks by a  
 248 certain method and valid cell tracks identified manually.

249 While cell tracking in proprietary software such as Imaris and Metamorph  
 250 yields results similar to the manual reference, both software packages only  
 251 provide positional information about cells, while morphological information  
 252 of cells is not available. Moreover, Imaris demands fluorescent labeling of  
 253 cells to obtain good segmentation results (Table S.4).

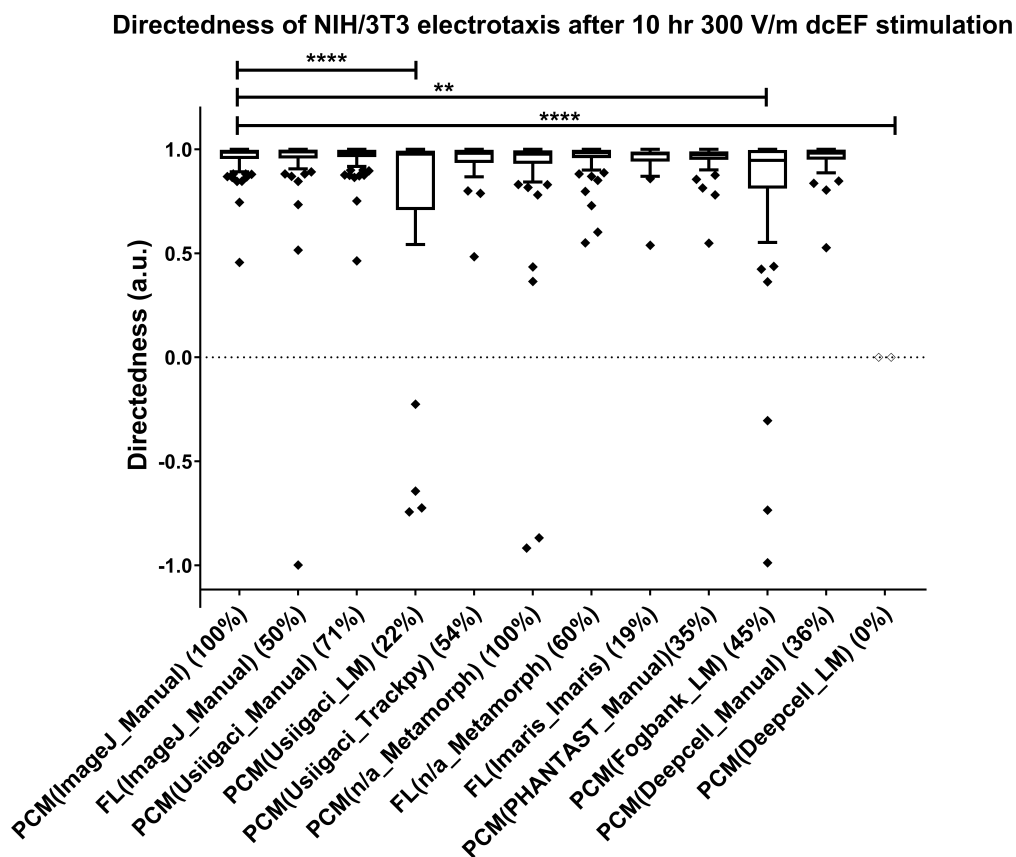

Figure 6: Directedness of NIH/3T3 electrotaxis after 10-hr, 300 V/m dcEF stimulation analyzed by different segmentation and tracking methods. Data and labels are arranged based on the type of images-(segmentation method\_tracking method) (capture rate). LM:Lineage Mapper; FL:fluorescence; PCM: phase contrast microscopy; \*\* denotes  $P < 0.01$ ; \*\*\*\* denotes  $P < 0.0001$ .

254 Even though open-source cell tracking software, such as Lineage Mapper  
255 is available [42], segmented data may not be directly compatible with Lineage  
256 Mapper if single cells are not segmented into individual instances correctly  
257 in every frame. Because Lineage Mapper is fully automatic, a manual veri-  
258 fication process is not available in Lineage Mapper. Imperfect segmentation  
259 results lead to erroneous tracking results and invalid tracks cannot be ex-  
260 cluded by users. Directedness of cells segmented by Fogbank and tracked by  
261 Lineage mapper ( $P < 0.01$ , Tukey's post-hoc) differs from the manual refer-  
262 ence. Cells segmented by Deepcell are not tracked well with Lineage Mapper  
263 ( $P < 0.0001$ , Tukey's post-hoc). Therefore, segmented results from PHAN-  
264 TAST and Deepcell on NIH/3T3 electrotaxis cannot yield good data by  
265 tracking with Lineage Mapper. While Usiigaci's segmented masks can also  
266 be tracked using Lineage Mapper, only 22% of cells are tracked compared  
267 to the manual tracking reference. The results from Lineage Mapper are also  
268 significantly different compared to a manual reference ( $P < 0.0001$ , one-way  
269 ANOVA), presumably due to erroneous tracking that cannot be verified man-  
270 ually. Misinterpretation may be made due to bad results if users do not fully  
271 grasp the inner workings of the tracking process (Figure 6).

272 In contrast, by segmenting and tracking with Usiigaci, 54% of cells can  
273 be automatically tracked when compared to manual tracking. Moreover,  
274 directedness and migration speed of cells analyzed by Usiigaci are comparable  
275 to the manual reference and Metamorph. Migration speed can be over- or  
276 under-estimated in Imaris or Lineage Mapper. Detailed tracking results are  
277 shown in Table S.4 in the SI document.

278 Usiigaci is the only automated cell tracking method that provides both cell  
279 movement and morphology change information among benchmarked software  
280 packages. With high segmentation and tracking accuracy, Usiigaci delivers  
281 quantitative cell migration analysis to biologists as an easy-to-use tool. A tu-  
282 torial video of Usiigaci's usage is provided in the supplementary information  
283 (Video S.1).

#### 284 **4. Impact and conclusions**

285 Usiigaci offers a reliable quantitative solution for segmentation, tracking,  
286 and analysis of cell migration in two-dimensional PCM. No label or special  
287 treatment of cells is required, so that cells can be analyzed under more nat-  
288 ural conditions. Entire outlines of cells are automatically segmented and  
289 tracked in Usiigaci, which enables biologists to analyze both movement and  
290 morphological changes in cellular dynamics in a quantitative manner that ex-  
291 isting software cannot provide. The labor-saving workflow also alleviates the  
292 workload in comparison to the manual cell tracking method that is conven-

293 tionally adopted. The manual verification function enables users to verify the  
294 tracking data and ensure data validity. The analytical capability of Usiigaci  
295 can contribute to the international effort to standardize cell migration exper-  
296 iments [43]. The trainable nature of the Mask R-CNN model allows Usiigaci  
297 to analyze images acquired in other bright-field microscopic techniques, and  
298 potentially for 3D cell tracking in the near future. Similar deep learning  
299 methods for biomedical image analysis are used to accomplish *in silico* label-  
300 ing of cellular components instain-free images and 3D segmentation of noisy  
301 medical images [44–47]. Advances in deep learning methods for biomedical  
302 image analysis provide unique opportunities to advance biomedical discovery.

### 303 **Acknowledgements**

304 This work is supported by JSPS KAKENHI [Grant Number JP1700362].  
305 H.-F. Tsai and A.Q. Shen also thank Okinawa Institute of Science and Tech-  
306 nology Graduate University (OIST) for its financial support with subsidy  
307 funding from the Cabinet Office, Government of Japan. Funders had no role  
308 in study design, data collection, the decision to publish, or preparation of the  
309 manuscript. The authors acknowledge support from the Scientific Comput-  
310 ing and Data Analysis Section, the Community Relations Section, and the  
311 Imaging Analysis Section of OIST Graduate University. The authors also  
312 thank Matterport Inc. for their Mask R-CNN implementation source code  
313 released under the MIT license for use in part of this work. The authors  
314 thank Mr. Emanuele Martini for his open-source BW\_Jtrack ImageJ plugin.  
315 The authors acknowledge Ms. Tsai, Yi-Ching (lotte891@gmail.com) and Ms.  
316 Shivani Sathish from Micro/Bio/Nanofluidics Unit at OIST for assistance in  
317 preparation of illustrations in this work. The authors thank Dr. Steven Aird,  
318 OIST’s technical editor for proofreading this article.

### 319 **Conflict of interests**

320 The authors declare no conflict of interests.

### 321 **Supplementary Information**

322 Supplementary information includes detailed description on cell migration  
323 experiments, microscopy protocols, annotation of training dataset, training  
324 process on the Mask R-CNN model, evaluation of multiple object tracking  
325 benchmark, and discussions on the limitation of Usiigaci. A video tutorial of  
326 Usiigaci is also attached (Video S.1).

327 **References**

- 328 [1] F. Zernike, Phase contrast, a new method for the microscopic obser-  
329 vation of transparent objects, *Physica* 9 (7) (1942) 686 – 698, ISSN  
330 0031-8914, doi:10.1016/S0031-8914(42)80035-X.
- 331 [2] N. Jaccard, N. Szita, L. D. Griffin, Segmentation of phase contrast mi-  
332 croscopy images based on multi-scale local Basic Image Features his-  
333 tograms., *Computer methods in biomechanics and biomedical engineer-*  
334 *ing. Imaging & visualization* 5 (2017) 359–367, ISSN 2168-1163, doi:  
335 10.1080/21681163.2015.1016243.
- 336 [3] R. Wollman, N. Stuurman, High throughput microscopy: from raw im-  
337 ages to discoveries., *Journal of cell science* 120 (2007) 3715–3722, ISSN  
338 0021-9533, doi:10.1242/jcs.013623.
- 339 [4] H.-F. Tsai, J.-Y. Cheng, H.-F. Chang, T. Yamamoto, A. Q. Shen, Uni-  
340 form electric field generation in circular multi-well culture plates using  
341 polymeric inserts., *Scientific reports* 6 (2016) 26222, ISSN 2045-2322,  
342 doi:10.1038/srep26222.
- 343 [5] J. E. Moore, E. Bürki, A. Suciu, S. Zhao, M. Burnier, H. R. Brunner,  
344 J. J. Meister, A device for subjecting vascular endothelial cells to both  
345 fluid shear stress and circumferential cyclic stretch., *Annals of biomed-*  
346 *ical engineering* 22 (1994) 416–422, ISSN 0090-6964.
- 347 [6] R. Steward, D. Tambe, C. C. Hardin, R. Krishnan, J. J. Fredberg,  
348 Fluid shear, intercellular stress, and endothelial cell alignment., *Ameri-*  
349 *can journal of physiology. Cell physiology* 308 (2015) C657–C664, ISSN  
350 1522-1563, doi:10.1152/ajpcell.00363.2014.
- 351 [7] C. J. Bettinger, R. Langer, J. T. Borenstein, Engineering substrate to-  
352 pography at the micro- and nanoscale to control cell function., *Ange-*  
353 *wandte Chemie (International ed. in English)* 48 (2009) 5406–5415, ISSN  
354 1521-3773, doi:10.1002/anie.200805179.
- 355 [8] E. Meijering, O. Dzyubachyk, I. Smal, Methods for cell and particle  
356 tracking, in: *Methods in enzymology*, vol. 504, Elsevier, 183–200, 2012.
- 357 [9] M. E. Ambühl, C. Brepant, J.-J. Meister, A. B. Verkhovsky, I. F.  
358 Sbalzarini, High-resolution cell outline segmentation and tracking from  
359 phase-contrast microscopy images., *Journal of microscopy* 245 (2012)  
360 161–170, ISSN 1365-2818, doi:10.1111/j.1365-2818.2011.03558.x.



- 361 [10] F. P. Cordelières, V. Petit, M. Kumasaka, O. Debeir, V. Letort, S. J.  
362 Gallagher, L. Larue, Automated cell tracking and analysis in phase-  
363 contrast videos (iTrack4U): development of Java software based on com-  
364 bined mean-shift processes, *PloS one* 8 (11) (2013) e81266.
- 365 [11] N. Jaccard, L. D. Griffin, A. Keser, R. J. Macown, A. Super, F. S. Ve-  
366 raitch, N. Szita, Automated method for the rapid and precise estimation  
367 of adherent cell culture characteristics from phase contrast microscopy  
368 images., *Biotechnology and bioengineering* 111 (2014) 504–517, ISSN  
369 1097-0290, doi:10.1002/bit.25115.
- 370 [12] J. Chalfoun, M. Majurski, A. Dima, C. Stuelten, A. Peskin, M. Brady,  
371 FogBank: a single cell segmentation across multiple cell lines and image  
372 modalities, *Bmc Bioinformatics* 15 (1) (2014) 431.
- 373 [13] C. T. Mierke, The fundamental role of mechanical properties in the  
374 progression of cancer disease and inflammation, *Reports on Progress in*  
375 *Physics* 77 (7) (2014) 076602.
- 376 [14] O. Ronneberger, P. Fischer, T. Brox, U-net: Convolutional networks for  
377 biomedical image segmentation, in: *International Conference on Medical*  
378 *image computing and computer-assisted intervention*, Springer, 234–  
379 241, 2015.
- 380 [15] D. A. Van Valen, T. Kudo, K. M. Lane, D. N. Macklin, N. T. Quach,  
381 M. M. DeFelice, I. Maayan, Y. Tanouchi, E. A. Ashley, M. W. Covert,  
382 Deep learning automates the quantitative analysis of individual cells  
383 in live-cell imaging experiments, *PLoS computational biology* 12 (11)  
384 (2016) e1005177.
- 385 [16] H. Niioka, S. Asatani, A. Yoshimura, H. Ohigashi, S. Tagawa, J. Miyake,  
386 Classification of C2C12 cells at differentiation by convolutional neural  
387 network of deep learning using phase contrast images., *Human cell* 31  
388 (2018) 87–93, ISSN 1749-0774, doi:10.1007/s13577-017-0191-9.
- 389 [17] T.-Y. Lin, M. Maire, S. Belongie, J. Hays, P. Perona, D. Ramanan,  
390 P. Dollár, C. L. Zitnick, Microsoft COCO: Common Objects in Context,  
391 in: D. Fleet, T. Pajdla, B. Schiele, T. Tuytelaars (Eds.), *Computer*  
392 *Vision – ECCV 2014*, Springer International Publishing, Cham, ISBN  
393 978-3-319-10602-1, 740–755, 2014.
- 394 [18] K. He, G. Gkioxari, P. Dollár, R. Girshick, Mask R-CNN, in:  
395 *Proc. IEEE Int. Conf. Computer Vision (ICCV)*, 2980–2988, doi:  
396 10.1109/ICCV.2017.322, 2017.

- 397 [19] M. Abadi, P. Barham, J. Chen, Z. Chen, A. Davis, J. Dean, M. Devin,  
398 S. Ghemawat, G. Irving, M. Isard, M. Kudlur, J. Levenberg, R. Monga,  
399 S. Moore, D. G. Murray, B. Steiner, P. Tucker, V. Vasudevan, P. War-  
400 den, M. Wicke, Y. Yu, X. Zheng, TensorFlow: A System for Large-scale  
401 Machine Learning, in: Proceedings of the 12th USENIX Conference on  
402 Operating Systems Design and Implementation, OSDI'16, USENIX As-  
403 sociation, Berkeley, CA, USA, ISBN 978-1-931971-33-1, 265–283, URL  
404 <http://dl.acm.org/citation.cfm?id=3026877.3026899>, 2016.
- 405 [20] F. Chollet, et al., Keras, <https://keras.io>, 2015.
- 406 [21] W. Abdulla, Mask R-CNN for object detection and  
407 instance segmentation on Keras and TensorFlow,  
408 [https://github.com/matterport/Mask\\_RCNN](https://github.com/matterport/Mask_RCNN), 2017.
- 409 [22] S. Ren, K. He, R. Girshick, J. Sun, Faster R-CNN: Towards Real-Time  
410 Object Detection with Region Proposal Networks, IEEE Transactions  
411 on Pattern Analysis and Machine Intelligence 39 (6) (2017) 1137–1149,  
412 ISSN 0162-8828, doi:10.1109/TPAMI.2016.2577031.
- 413 [23] K. He, X. Zhang, S. Ren, J. Sun, Deep residual learning for image  
414 recognition, in: Proceedings of the IEEE conference on computer vision  
415 and pattern recognition, 770–778, 2016.
- 416 [24] T. Lin, P. Dollár, R. Girshick, K. He, B. Hariharan, S. Belongie, Fea-  
417 ture Pyramid Networks for Object Detection, in: Proc. IEEE Conf.  
418 Computer Vision and Pattern Recognition (CVPR), ISSN 1063-6919,  
419 936–944, doi:10.1109/CVPR.2017.106, 2017.
- 420 [25] D. B. Allan, T. Caswell, N. C. Keim, C. M. van der  
421 Wel, trackpy: Trackpy v0.4.1, doi:10.5281/zenodo.1226458, URL  
422 <https://doi.org/10.5281/zenodo.1226458>, 2018.
- 423 [26] J. L. Bentley, Multidimensional Binary Search Trees Used  
424 for Associative Searching, Commun. ACM 18 (9) (1975)  
425 509–517, ISSN 0001-0782, doi:10.1145/361002.361007, URL  
426 <http://doi.acm.org/10.1145/361002.361007>.
- 427 [27] J. C. Crocker, D. G. Grier, Methods of digital video microscopy for  
428 colloidal studies, Journal of colloid and interface science 179 (1) (1996)  
429 298–310.

- 430 [28] S. Maneewongvatana, D. M. Mount, On the efficiency of nearest neighbor  
431 searching with data clustered in lower dimensions, in: International  
432 Conference on Computational Science, Springer, 842–851, 2001.
- 433 [29] R. Computing, PyQt, PyQt is available online at [http://www.river-](http://www.riverbankcomputing.co.uk/)  
434 [bankcomputing.co.uk/](http://www.riverbankcomputing.co.uk/), visited on June 13.
- 435 [30] L. Campagnola, PyQtGraph-scientific graphics and GUI library for  
436 python, 2016.
- 437 [31] S. van der Walt, J. L. Schönberger, J. Nunez-Iglesias, F. Boulogne, J. D.  
438 Warner, N. Yager, E. Gouillart, T. Yu, scikit-image contributors, scikit-  
439 image: image processing in Python., PeerJ 2 (2014) e453, ISSN 2167-  
440 8359, doi:10.7717/peerj.453.
- 441 [32] W. McKinney, et al., Data structures for statistical computing in python,  
442 in: Proceedings of the 9th Python in Science Conference, vol. 445,  
443 Austin, TX, 51–56, 2010.
- 444 [33] T. E. Oliphant, A guide to NumPy, vol. 1, Trelgol Publishing USA,  
445 2006.
- 446 [34] T. E. Oliphant, SciPy: Open source scientific tools for Python, Com-  
447 puting in Science and Engineering 9 (2007) 10–20.
- 448 [35] H.-F. Tsai, C.-W. Huang, H.-F. Chang, J. J. Chen, C.-H. Lee, J.-Y.  
449 Cheng, Evaluation of EGFR and RTK signaling in the electrotaxis of  
450 lung adenocarcinoma cells under direct-current electric field stimulation,  
451 PLoS One 8 (8) (2013) e73418, doi:10.1371/journal.pone.0073418.
- 452 [36] T. Kluyver, B. Ragan-Kelley, F. Pérez, B. E. Granger, M. Bussonnier,  
453 J. Frederic, K. Kelley, J. B. Hamrick, J. Grout, S. Corlay, et al., Jupyter  
454 Notebooks-a publishing format for reproducible computational work-  
455 flows., in: ELPUB, 87–90, 2016.
- 456 [37] J. D. Hunter, Matplotlib: A 2D graphics environment, Computing in  
457 science & engineering 9 (3) (2007) 90–95.
- 458 [38] M. Waskom, O. Botvinnik, D. O’Kane, P. Hobson, S. Lukauskas, D. C.  
459 Gempferline, T. Augspurger, Y. Halchenko, J. B. Cole, J. Warmenhoven,  
460 J. de Rooter, C. Pye, S. Hoyer, J. Vanderplas, S. Villalba, G. Kunter,  
461 E. Quintero, P. Bachant, M. Martin, K. Meyer, A. Miles, Y. Ram,  
462 T. Yarkoni, M. L. Williams, C. Evans, C. Fitzgerald, Brian, C. Fonnes-  
463 beck, A. Lee, A. Qalieh, mwaskom/seaborn: v0.8.1 (September 2017),  
464 doi:10.5281/zenodo.883859, 2017.

- 465 [39] P. Masuzzo, L. Huyck, A. Simiczjew, C. Ampe, L. Martens,  
466 M. Van Troys, An end-to-end software solution for the analysis of high-  
467 throughput single-cell migration data., *Scientific reports* 7 (2017) 42383,  
468 ISSN 2045-2322, doi:10.1038/srep42383.
- 469 [40] K. Bernardin, R. Stiefelhagen, Evaluating multiple object tracking per-  
470 formance: the CLEAR MOT metrics, *Journal on Image and Video Pro-*  
471 *cessing* 2008 (2008) 1.
- 472 [41] A. Milan, L. Leal-Taixé, I. Reid, S. Roth, K. Schindler, MOT16: A  
473 benchmark for multi-object tracking, arXiv preprint arXiv:1603.00831 .
- 474 [42] J. Chalfoun, M. Majurski, A. Dima, M. Halter, K. Bhadriraju, M. Brady,  
475 Lineage mapper: A versatile cell and particle tracker, *Scientific Reports*  
476 6 (2016) 36984, doi:10.1038/srep36984.
- 477 [43] P. Masuzzo, L. Martens, et al., An open data ecosystem for cell migra-  
478 tion research, *Trends in cell biology* 25 (2) (2015) 55–58.
- 479 [44] E. M. Christiansen, S. J. Yang, D. M. Ando, A. Javaherian, G. Skibinski,  
480 S. Lipnick, E. Mount, A. O’Neil, K. Shah, A. K. Lee, et al., In silico  
481 labeling: Predicting fluorescent labels in unlabeled images, *Cell* 173 (3)  
482 (2018) 792–803.
- 483 [45] J. Kimmel, A. Brack, W. Marshall, Deep convolutional and recurrent  
484 neural networks for cell motility discrimination and prediction .
- 485 [46] Ö. Çiçek, A. Abdulkadir, S. S. Lienkamp, T. Brox, O. Ronneberger,  
486 3D U-Net: learning dense volumetric segmentation from sparse anno-  
487 tation, in: *International Conference on Medical Image Computing and*  
488 *Computer-Assisted Intervention*, Springer, 424–432, 2016.
- 489 [47] M. Xu, D. P. Papageorgiou, S. Z. Abidi, M. Dao, H. Zhao, G. E. Kar-  
490 niadakis, A deep convolutional neural network for classification of red  
491 blood cells in sickle cell anemia, *PLoS computational biology* 13 (10)  
492 (2017) e1005746.

493 **Required Metadata**

494 **Current code version**

| <b>Nr.</b> | <b>Code metadata description</b>                                | <b>Please fill in this column</b>                                   |
|------------|-----------------------------------------------------------------|---------------------------------------------------------------------|
| C1         | Current code version                                            | v1.0                                                                |
| C2         | Permanent link to code/repository used for this code version    | <i>https://github.com/oist/Usiigaci</i>                             |
| C3         | Legal Code License                                              | MIT License                                                         |
| C4         | Code versioning system used                                     | git                                                                 |
| C5         | Software code languages, tools, and services used               | Python, TensorFlow, Keras, Trackpy, NumPy, SciPy, Pandas, PyQtGraph |
| C6         | Compilation requirements, operating environments & dependencies | Ubuntu 16.04 Linux, Python3.4+, CUDA9.1, TensorFlow 1.4, Keras 2.1  |
| C7         | If available Link to developer documentation/manual             | None                                                                |
| C8         | Support email for questions                                     | hsieh-fu.tsai@oist.jp                                               |

Table 3: Code metadata
